# Supplementary material
Source: publisher figshare collection journal article supplement (https://gsapubs.figshare.com/articles/dataset/_/12268958)

Yong Du, Huyue Song, Jinnan Tong, Thomas J. Algeo, Zhe Li, Haijun Song, and Jiandong Huang, 2020, Changes in productivity associated with algal-microbial shifts during the Early Triassic recovery of marine ecosystems: *GSA Bulletin*, <https://doi.org/10.1130/B35510.1>.

## Supplemental Material

**Table S1.** data from four stratigraphic sections in the Chaohu area.

**Table S2.** data from the Spiti section.

**Figure S1.** chromatogram.

Relative Abundance

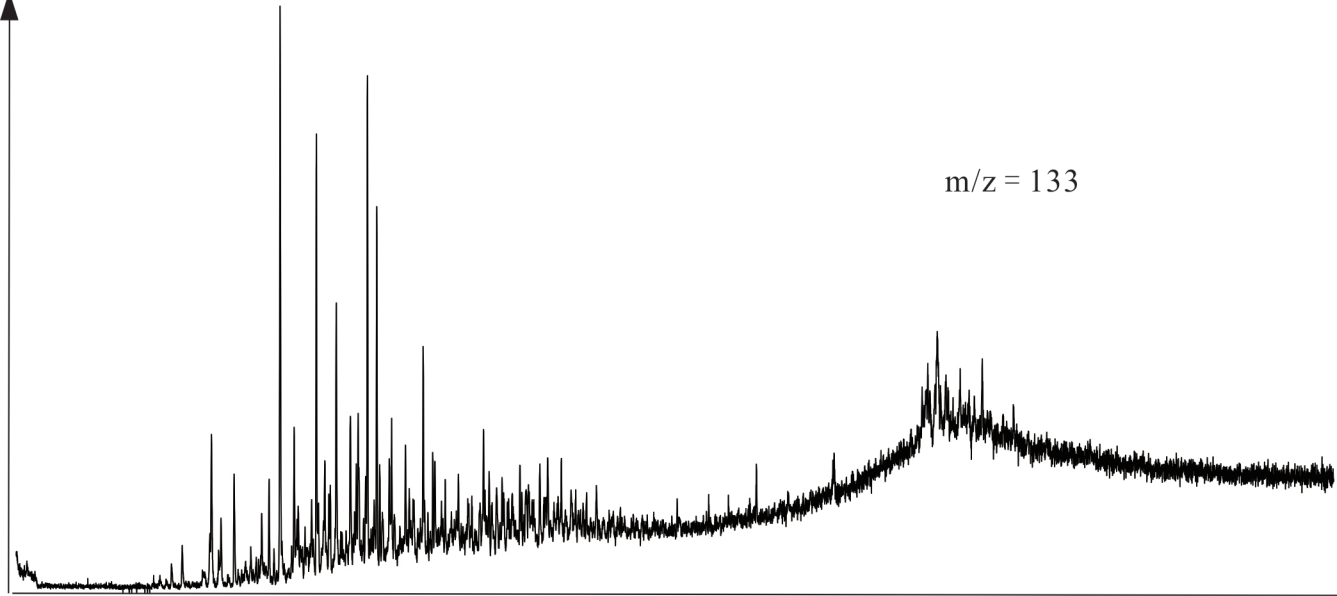

$m/z = 133$

Retention Time

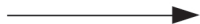

Supplement: Supplementary file 1 [file 1]
